# Supplementary material for: LTE1 promotes exit from mitosis by multiple mechanisms
Source: PubMed Central journal article supplement — Mol Biol Cell. 2016 Dec 15;27(25):3991–4001. doi: 10.1091/mbc.E16-08-0563 (PMC5156540; doi:10.1091/mbc.e16-08-0563), 2016-12-15
Supplement: supp_E16-08-0563v1_CombinedSupMats.pdf [file supp_E16-08-0563v1_CombinedSupMats.pdf]

# Supplemental Materials

*Molecular Biology of the Cell*

Falk et al.

**Supplemental Figure 1. The GEF Domains of Lte1 Promote Mitotic Exit in the Absence of *SPO12***

**A-B)** Ten-fold serial dilutions of overnight cultures of *lte1* $\Delta$  (A18591), *lte1* $\Delta$  *pLTE1-LTE1* (AS246), *lte1* $\Delta$  *spo12* $\Delta$  *pLTE1-LTE1* (AS245), *lte1* $\Delta$  *pLTE1-lte1* $\Delta$  *EcoRI* (AS243) and *lte1* $\Delta$  *spo12* $\Delta$  *pLTE1-lte1* $\Delta$  *EcoRI* (AS241) were spotted onto YEPD+ade+trp plates and incubated at either 30°C or 15°C.

**A**

YPD 30°C

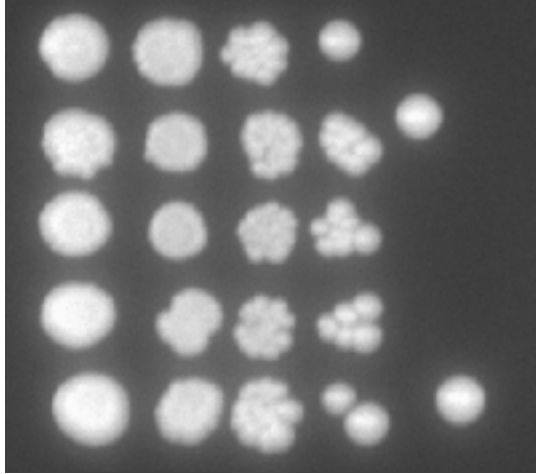*lte1Δ**lte1Δ LTE1**lte1Δ spo12Δ LTE1**lte1Δ lte1-ΔEcoRI**lte1Δ spo12Δ lte1-ΔEcoRI***B**

YPD 15°C

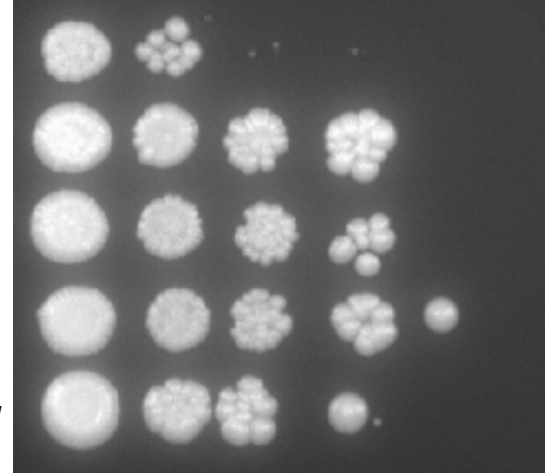

Supplemental File 1: Strains Used in this Study

|        |                                                                                                                                                           |
|--------|-----------------------------------------------------------------------------------------------------------------------------------------------------------|
| A1931  | <i>MATa, DBF2-3MYC</i>                                                                                                                                    |
| A2472  | <i>MATa, bub2::HIS3, DBF2-3MYC</i>                                                                                                                        |
| A2587  | <i>MATa, ade2-1, leu2-3, ura3, trp1-1, his3-11,15, can1-100, GAL, psi+ (Wild type W303)</i>                                                               |
| A4874  | <i>MATa, spo12::HIS3</i>                                                                                                                                  |
| A18591 | <i>MATa, lte1::kanMX6</i>                                                                                                                                 |
| A21299 | <i>MATa, Kin4(S508A):Kin4'3'UTR:KanMx6</i>                                                                                                                |
| A23686 | <i>MATa, KanMx6:GAL-URL-3HA-LTE1</i>                                                                                                                      |
| A24084 | <i>MATa, KanMx6:GAL-URL-3HA-LTE1, Kin4(S508A):Kin4'3'UTR:KanMx6,</i>                                                                                      |
| A24543 | <i>MATa, KanMx6:GAL-URL-3HA-LTE1, spo12::HIS3</i>                                                                                                         |
| A26170 | <i>MATa, Kin4(S508A)-GFP:HisMx6, ura3::pRS306-mCherry-TUB1::URA3, bub2Δ:KanMx6, lte1Δ:NatMx6</i>                                                          |
| A26874 | <i>MATa, Kin4(S508A)-GFP:HisMx6, ura3::pRS306-mCherry-TUB1::URA3, bub2::HIS3</i>                                                                          |
| A29611 | <i>MATa, Dyn1-3V5-AID:KanMX, leu2::pTEF1-osTIR::LEU2, kar9::HIS5, ura3::pAFS125-TUB1p-GFPTUB1::URA3, spo12::HIS3, LTE1-8N:LTE1-3'UTR:TRP1, kin4::TRP1</i> |
| A33138 | <i>MATa, ura3::pAFS125-TUB1p-GFPTUB1::URA3</i>                                                                                                            |
| A35146 | <i>Mata, Dyn1-3V5-AID:KanMX, leu2::pTEF1-osTIR::LEU2, kar9::HIS5, ura3::pAFS125-TUB1p-GFPTUB1::URA3, swe1Δ:KanMx6</i>                                     |
| A35432 | <i>MATa, kin4::TRP1, DBF2-3MYC</i>                                                                                                                        |
| A35603 | <i>MATa, Dyn1-3V5-AID:KanMX, leu2::pTEF1-osTIR::LEU2, kar9::HIS5, ura3::pAFS125-TUB1p-GFPTUB1::URA3, kin4::TRP1</i>                                       |
| A35699 | <i>MATa, leu2::pTEF1-osTIR::LEU2, ura3::pAFS125-TUB1p-GFPTUB1::URA3</i>                                                                                   |
| A35700 | <i>MATa, Dyn1-3V5-AID:KanMX, leu2::pTEF1-osTIR::LEU2, kar9::HIS5, ura3::pAFS125-TUB1p-GFPTUB1::URA3, spo12::HIS3</i>                                      |
| A35707 | <i>MATa, Dyn1-3V5-AID:KanMX, leu2::pTEF1-osTIR::LEU2, kar9::HIS5, ura3::pAFS125-TUB1p-GFPTUB1::URA3</i>                                                   |
| A36048 | <i>MATa, Dyn1-3V5-AID:KanMX, leu2::pTEF1-osTIR::LEU2, kar9::HIS5, ura3::pAFS125-TUB1p-GFPTUB1::URA3, kin4::TRP1, spo12::HIS3</i>                          |
| A36082 | <i>MATa, Dyn1-3V5-AID:KanMX, leu2::pTEF1-osTIR::LEU2, kar9::HIS5, ura3::pAFS125-TUB1p-GFPTUB1::URA3, bub2::HIS3</i>                                       |
| A36268 | <i>MATa, Dyn1-3V5-AID:KanMX, leu2::pTEF1-osTIR::LEU2, kar9::HIS5, ura3::pAFS125-TUB1p-GFPTUB1::URA3, kin4::TRP1, LTE1-8N:LTE1-3'UTR:TRP1</i>              |
| A36357 | <i>MATa, Dyn1-3V5-AID:KanMX, leu2::pTEF1-osTIR::LEU2, kar9::HIS5, ura3::pAFS125-TUB1p-GFPTUB1::URA3, LTE1-8N:LTE1-3'UTR:TRP1</i>                          |
| A36358 | <i>MATa, Dyn1-3V5-AID:KanMX, leu2::pTEF1-osTIR::LEU2, kar9::HIS5, ura3::pAFS125-TUB1p-GFPTUB1::URA3, spo12::HIS3, LTE1-8N:LTE1-3'UTR:TRP1</i>             |

|        |                                                                                                                                                             |
|--------|-------------------------------------------------------------------------------------------------------------------------------------------------------------|
| A36544 | <i>MATa, Dyn1-3V5-AID:KanMX, leu2::pTEF1-osTIR::LEU2, kar9::HIS5, ura3::pAFS125-TUB1p-GFPTUB1::URA3, bmh1::KanMX6</i>                                       |
| A36603 | <i>MATa, ura3::pAFS125-TUB1p-GFPTUB1::URA3, bub2::HIS3, spo12::HIS3, lte1Δ::NatMx6,</i>                                                                     |
| A36604 | <i>MATa, ura3::pAFS125-TUB1p-GFPTUB1::URA3, bub2::HIS3, spo12::HIS3</i>                                                                                     |
| A36605 | <i>MATa, ura3::pAFS125-TUB1p-GFPTUB1::URA3, spo12::HIS3</i>                                                                                                 |
| A36607 | <i>MATa, ura3::pAFS125-TUB1p-GFPTUB1::URA3, spo12::HIS3, lte1Δ::NatMx6, kin4::KanMx6</i>                                                                    |
| A36608 | <i>MATa, ura3::pAFS125-TUB1p-GFPTUB1::URA3, bub2::HIS3</i>                                                                                                  |
| A36620 | <i>MATa, ura3::pAFS125-TUB1p-GFPTUB1::URA3, spo12::HIS3, kin4::KanMx6</i>                                                                                   |
| A36718 | <i>MATa, ura3::pAFS125-TUB1p-GFPTUB1::URA3, lte1Δ::NatMx6</i>                                                                                               |
| A36722 | <i>MATa, spo12::HIS3, dyn1Δ::HIS5Mx6, ura3::pRS306-mCherry-TUB1::URA3, DBF2-eGFP::KanMX6, bub2::LEU2</i>                                                    |
| A36782 | <i>MATa, dyn1Δ::HIS5Mx6, ura3::pRS306-mCherry-TUB1::URA3, DBF2-eGFP::KanMX6, kin4::TRP1</i>                                                                 |
| A36850 | <i>MATa, dyn1Δ::HIS5Mx6, ura3::pRS306-mCherry-TUB1::URA3, DBF2-eGFP::KanMX6, bub2::LEU2</i>                                                                 |
| A36851 | <i>MATa, spo12::HIS3, dyn1Δ::HIS5Mx6, ura3::pRS306-mCherry-TUB1::URA3, DBF2-eGFP::KanMX6, kin4::TRP1</i>                                                    |
| A36852 | <i>MATa, dyn1Δ::HIS5Mx6, ura3::pRS306-mCherry-TUB1::URA3, DBF2-eGFP::KanMX6</i>                                                                             |
| A36965 | <i>MATa, Dyn1-3V5-AID:KanMX, leu2::pTEF1-osTIR::LEU2, kar9::HIS5, ura3::pAFS125-TUB1p-GFPTUB1::URA3, bub2::HIS3,spo12::HIS3</i>                             |
| A37134 | <i>MATa, spo12::HIS3, dyn1Δ::HIS5Mx6, ura3::pRS306-mCherry-TUB1::URA3, DBF2-eGFP::KanMX6</i>                                                                |
| A37483 | <i>MATa, Dyn1-3V5-AID:KanMX, leu2::pTEF1-osTIR::LEU2, kar9::HIS5, ura3::pAFS125-TUB1p-GFPTUB1::URA3, rts1Δ::NatMx6</i>                                      |
| A38120 | <i>MATa, Kin4(S508A)-GFP:HisMx6, ura3::pRS306-mCherry-TUB1::URA3, bub2::HIS3 leu2::CgLEU2-pLTE1-lte1DecoRI, lte1Δ::NatMx6</i>                               |
| A38140 | <i>MATa, ura3::pAFS125-TUB1p-GFPTUB1::URA3, kin4::KanMx6, lte1Δ::NatMx6</i>                                                                                 |
| A38141 | <i>MATa, ura3::pAFS125-TUB1p-GFPTUB1::URA3, kin4::KanMx6</i>                                                                                                |
| A38199 | <i>MATa, leu2::CgLEU2-pLTE1-LTE1, lte1::KanMX6, Kin4(S508A)-GFP:HisMx6, ura3::pRS306-mCherry-TUB1::URA3, bub2::HIS3</i>                                     |
| A38247 | <i>MATa, KanMx6:GAL-URL-3HA-LTE1, Kin4(S508A):Kin4'3'UTR:KanMx6, leu2::CgLEU2-pLTE1-LTE1</i>                                                                |
| A38260 | <i>MATa, KanMx6:GAL-URL-3HA-LTE1, spo12::HIS3, leu2::CgLEU2-pLTE1-LTE1</i>                                                                                  |
| A38290 | <i>MATa, Dyn1-3V5-AID:KanMX, ura3::pAFS125-TUB1p-GFPTUB1::URA3, spo12::HIS3, cdc15::HIS3, leu2:: CDC15-HA3-7A-LEU2, kar9::HIS5, his3::pGPD1-osTIR::HIS3</i> |
| A38294 | <i>MATa, Dyn1-3V5-AID:KanMX, ura3::pAFS125-TUB1p-GFPTUB1::URA3, spo12::HIS3, cdc15::HIS3, leu2:: CDC15-HA3-LEU2, kar9::HIS5, his3::pGPD1-osTIR::HIS3</i>    |
| A38963 | <i>MATa, Dyn1-3V5-AID:KanMX, ura3::pAFS125-TUB1p-GFPTUB1::URA3, cdc15::HIS3, leu2:: CDC15-HA3-7A-LEU2, kar9::HIS5, his3::pGPD1-osTIR::HIS3</i>              |

|        |                                                                                                                                            |
|--------|--------------------------------------------------------------------------------------------------------------------------------------------|
| A38964 | <i>MATa, Dyn1-3V5-AID:KanMX, ura3::pAFS125-TUB1p-GFPTUB1::URA3, cdc15::HIS3, leu2::CDC15-HA3-LEU2, kar9::HIS5, his3::pGPD1-osTIR::HIS3</i> |
| AS184  | <i>MATa, LTE1-GFP(S65T)::HIS3MX6 ura3-PRS306-mCherry-TUB1::URA3</i>                                                                        |
| AS241  | <i>MATa, lte1::kanMX6, leu::CgLEU2-pLTE1-lte1deltaEcoRI, spo12::HIS3</i>                                                                   |
| AS243  | <i>MATa, lte1::kanMX6, leu::CgLEU2-pLTE1-lte1deltaEcoRI</i>                                                                                |
| AS245  | <i>MATa, lte1::kanMX6, leu2::CgLEU2-pLTE1-LTE1 spo12::HIS3</i>                                                                             |
| AS246  | <i>MATa, lte1::kanMX6, leu2::CgLEU2-pLTE1-LTE1</i>                                                                                         |
| AS336  | <i>MATa, KanMx6:GAL-URL-3HA-LTE1, Kin4(S508A):Kin4'3'UTR:KanMx6, leu::CgLEU2-pLTE1-lte1deltaEcoRI</i>                                      |
| AS338  | <i>MATa, KanMx6:GAL-URL-3HA-LTE1, spo12::HIS3, leu::CgLEU2-pLTE1-lte1deltaEcoRI</i>                                                        |
| AS351  | <i>MATa, leu2::CgLEU2-pLTE1-lte1deltaEcoRI-GFP(S65T)::HIS3MX6 ura3-PRS306-mCherry-TUB1::URA3</i>                                           |
| AS365  | <i>MATa, lte1::kanMX6, leu2::CgLEU2-pLTE1-LTE1, KIN4(1-341)-GFP:HIS3Mx6, ura3::pRS306-mCherry-TUB1::URA3</i>                               |
| AS367  | <i>MATa, lte1::kanMX6, leu2::CgLEU2-pLTE1-lte1deltaEcoRI, KIN4(1-341)-GFP:HIS3Mx6, ura3::pRS306-mCherry-TUB1::URA3</i>                     |
